# Supplementary material for: Chronic High Fat Diet Intake Impairs Hepatic Metabolic Parameters in Ovariectomized Sirt3 KO Mice
Source: MDPI journal article supplement (doi:10.3390/ijms22084277), 2021-04-20
Supplement: s1 [file s1]

## Supplementary material

### Chronic High Fat Diet Intake Impairs Hepatic Metabolic Parameters in Ovariectomized Sirt3 KO Mice

Marija Pinterić <sup>1†</sup>, Iva I. Podgorski <sup>1†</sup>, Marijana Popović Hadžija <sup>1</sup>, Ivana Tartaro Bujak <sup>2</sup>, Ana Tadijan <sup>1</sup>, Tihomir Balog <sup>1</sup>, Sandra Sobočanec <sup>1\*</sup>

<sup>1</sup> Division of Molecular Medicine, Ruđer Bošković Institute, 10000 Zagreb, Croatia

<sup>2</sup> Division of Materials Chemistry, Ruđer Bošković Institute, 10000 Zagreb, Croatia

<sup>†</sup> Equal contribution

\*Correspondence: ssoboc@irb.hr; tel.+385-1-4561-172

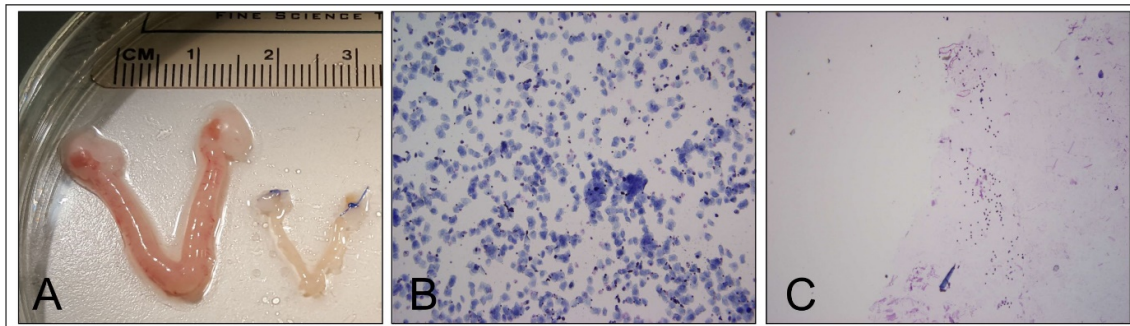

**Figure S1.** Observations of uterus deterioration and vaginal smears of control (sham) and ovariectomized (ovx) mice. **(A)** The uteri of sham and ovx mice. Vaginal smears from sham **(B)** and ovx **(C)** mice.

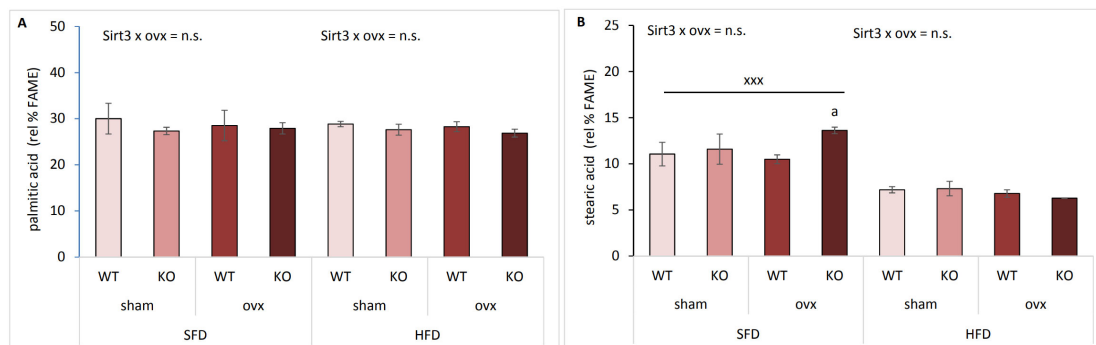

**Figure S2.** Graphical display of hepatic SFA content in sham and ovx Sirt3 WT and KO mice after 10 weeks of feeding with SFD or HFD. **(A) Palmitic acid.** SFD: no changes. HFD: no changes. SFD vs. HFD: no changes. **(B) Stearic acid.** SFD: ovx WT vs. KO ( $^ap < 0.001$ ). HFD: no changes. SFD vs. HFD:  $^{xxx}p < 0.001$ . Data are shown as mean  $\pm$  SD. N=4 mice per group.

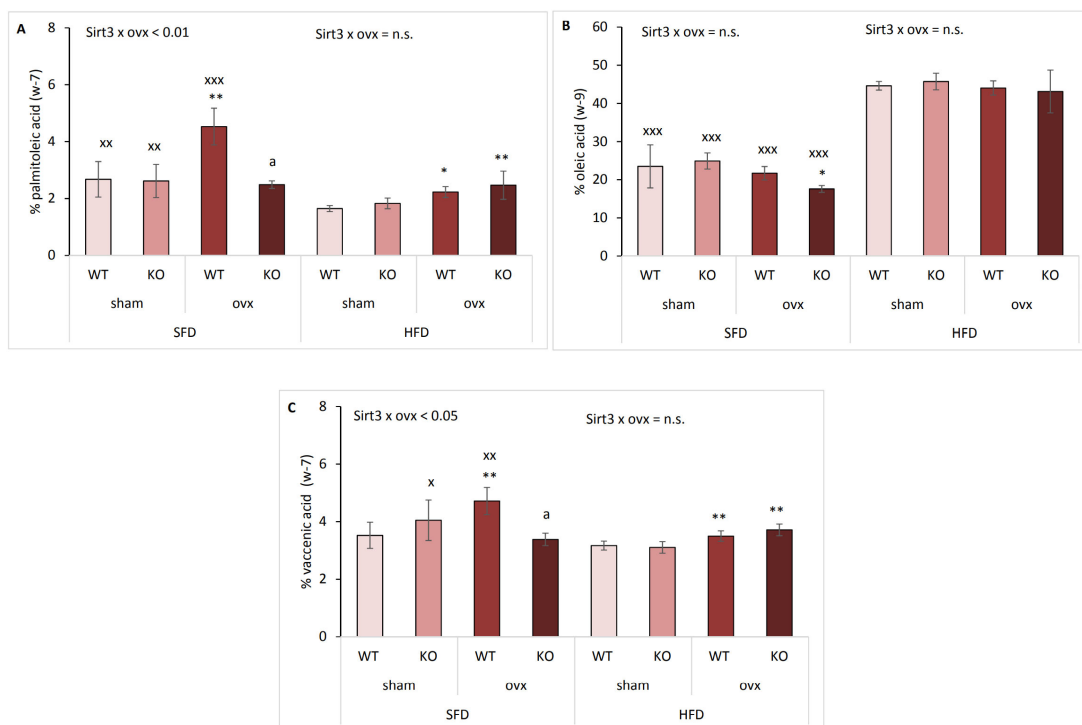

**Figure S3.** Graphical display of hepatic MUFA content in sham and ovx Sirt3 WT and KO mice after 10 weeks of feeding with SFD or HFD. **(A) Palmitoleic acid.** SFD: ovx WT vs. KO ( $^ap<0.01$ ); WT sham vs. ovx ( $^{**}p<0.01$ ). HFD: WT ovx vs. sham ( $^*p<0.05$ ); KO ovx vs. sham ( $^{**}p<0.01$ ). SFD vs. HFD: sham ( $^{xx}p<0.01$ ); WT ovx ( $^{xxx}p<0.001$ ). **(B) Oleic acid.** SFD: KO ovx vs. sham ( $^*p<0.05$ ). HFD: no changes. SFD vs. HFD:  $^{xxx}p<0.001$ . **(C) Vaccenic acid.** SFD: ovx WT vs. KO ( $^ap<0.01$ ); WT sham vs. ovx ( $^{**}p<0.01$ ). HFD: ovx vs. sham ( $^{**}p<0.01$ ). SFD vs. HFD: KO sham ( $^x p<0.05$ ); WT ovx ( $^{xx}p<0.01$ ). Data are shown as mean  $\pm$  SD. N=4 mice per group.

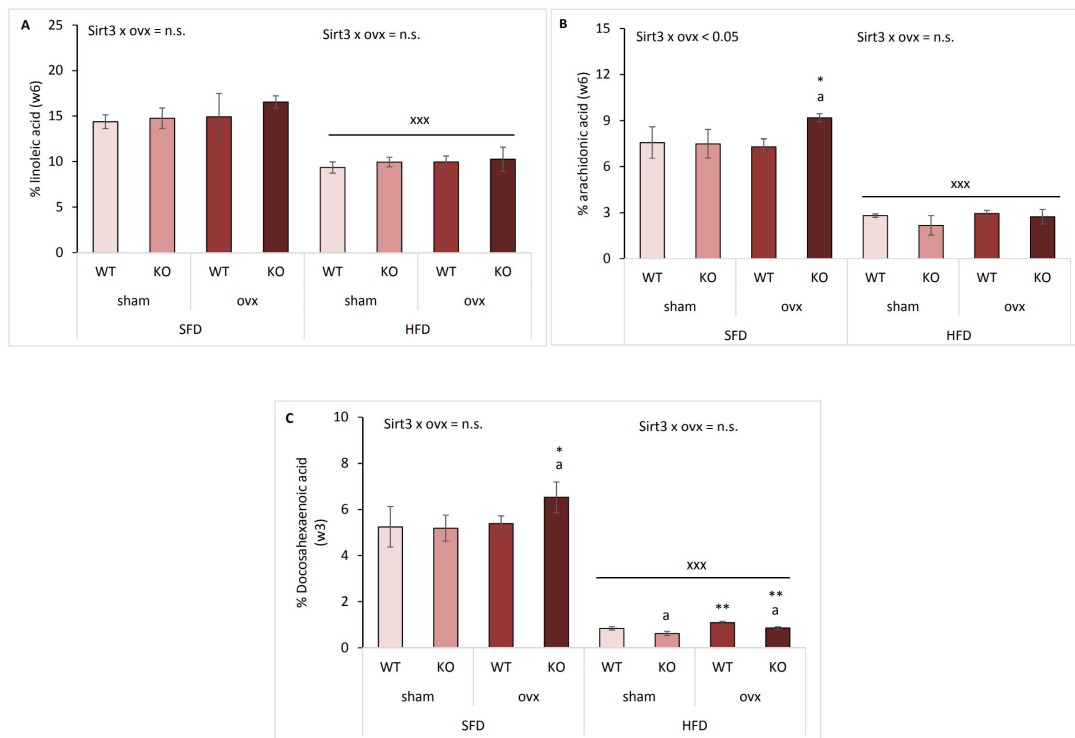

**Figure S4.** Graphical display of hepatic PUFA content in sham and ovx Sirt3 WT and KO mice after 10 weeks of feeding with SFD or HFD. **(A) Linoleic acid.** SFD: no changes. HFD: no changes. SFD vs. HFD:  $^{xxx}p<0.001$ . **(B) Arachidonic acid.** SFD: ovx WT vs. KO ( $^ap<0.01$ ); KO sham vs. ovx ( $^{**}p<0.01$ ). HFD: no changes. SFD vs. HFD: KO sham ( $^x p<0.05$ ); WT ovx ( $^{xx}p<0.01$ ). Data are shown as mean  $\pm$  SD. N=4 mice per group.

vs. ovx (\* $p<0.05$ ). HFD: no changes. SFD vs. HFD: <sup>xxx</sup> $p<0.001$ . **(C) Docosahexaenoic acid.** SFD: KO sham vs. ovx (\* $p<0.05$ ); ovx WT vs. KO (<sup>a</sup> $p<0.05$ ). HFD: KO vs. WT (<sup>a</sup> $p<0.05$ ); ovx vs. sham (\*\* $p<0.01$ ). SFD vs. HFD: <sup>xxx</sup> $p<0.001$ . Data are shown as mean  $\pm$  SD. N=4 mice per group.

**Table S1.** Assays (Taqman® Applied Biosystems, UK) used for the real time quantitative PCR analyses

| Gene                            | Assay ID      | Product size (bp) |
|---------------------------------|---------------|-------------------|
| <i><math>\beta</math>-actin</i> | Mm00607939_s1 | 115               |
| <i>sirt3</i>                    | Mm00452131_m1 | 68                |
| <i>cyp2e1</i>                   | Mm00491127_m1 | 83                |
| <i>cyp4a14</i>                  | Mm00484132_m1 | 71                |
| <i>ppara</i>                    | Mm00627559_m1 | 86                |
| <i>pgc1<math>\alpha</math></i>  | Mm00447183_m1 | 104               |
| <i>ho-1</i>                     | Mm00516007_m1 | 92                |

**Table S2.** Antibodies used in this study for the Western blot analyses

| Antibody            | Dilution | Host   | Manufacturer                   |
|---------------------|----------|--------|--------------------------------|
| Sirt3 (D22A3)       | 1:1000   | Rabbit | Cell Signaling Technology, USA |
| Anti-rabbit (NA934) | 1:5000   | Goat   | GE Healthcare, USA             |
